# Supplementary material
Source: PubMed Central journal article supplement (PMC6456408)
Supplement: NIHMS1522109-supplement-1.pdf [file NIHMS1522109-supplement-1.pdf]

Figure S1

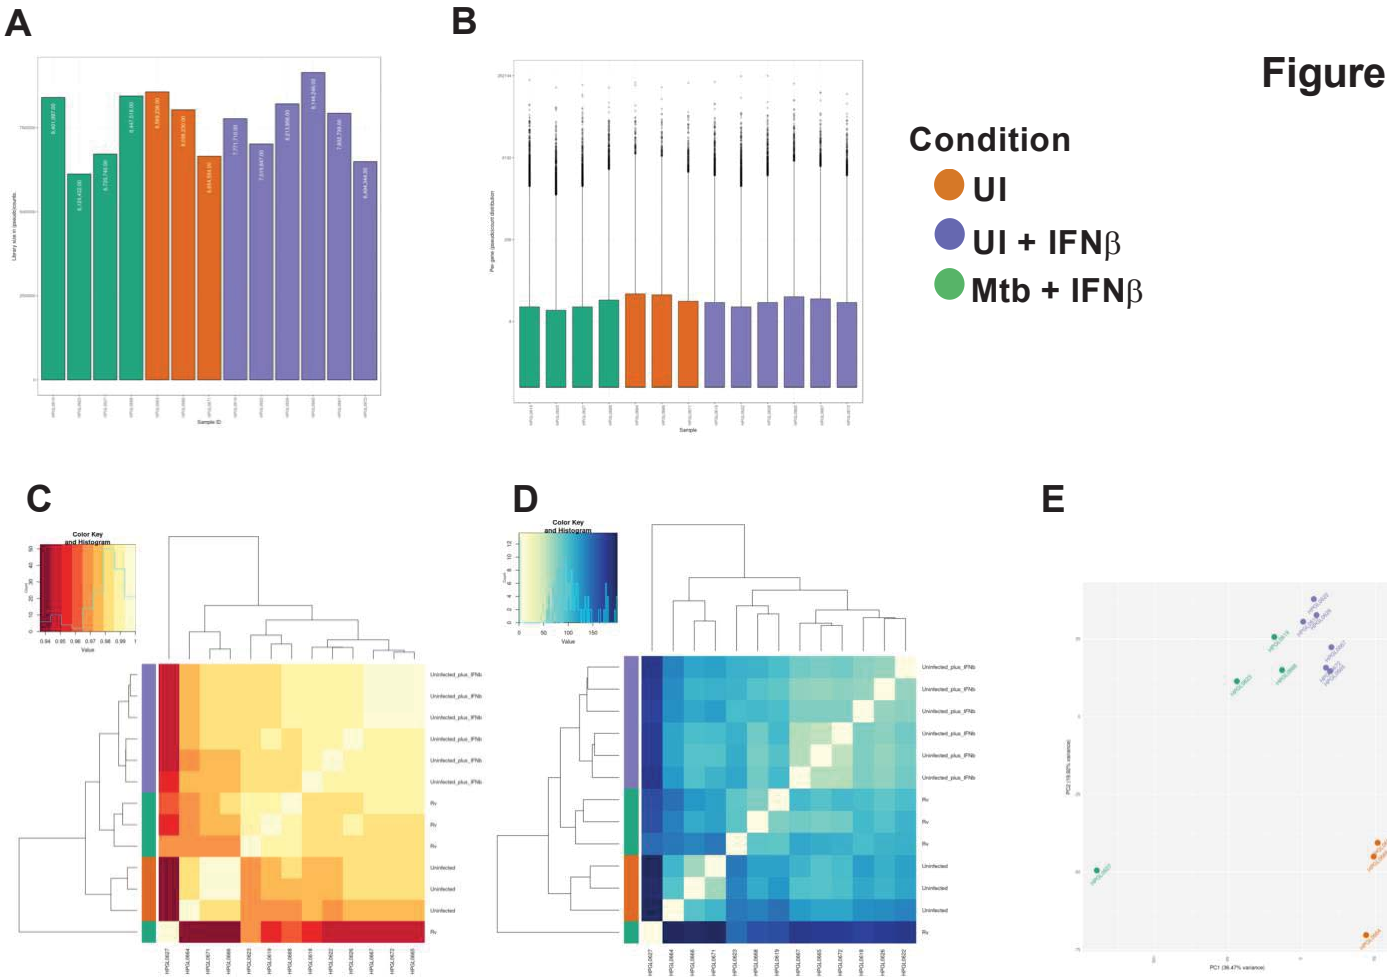

S1 Fig. RNA-seq analysis

(A) Raw RNAseq library sizes, colored according to experimental condition: uninfected (UI), uninfected or Mtb infected cells treated with 50pg/ml IFN- $\beta$  for 4 hours. (B) Distribution of raw gene counts for each sample. (C) Pearson correlation and (D) Euclidean distance biclustering heatmap. (E) PCA plots of log<sub>2</sub>-CPM and quantile normalized read counts.

Figure S2

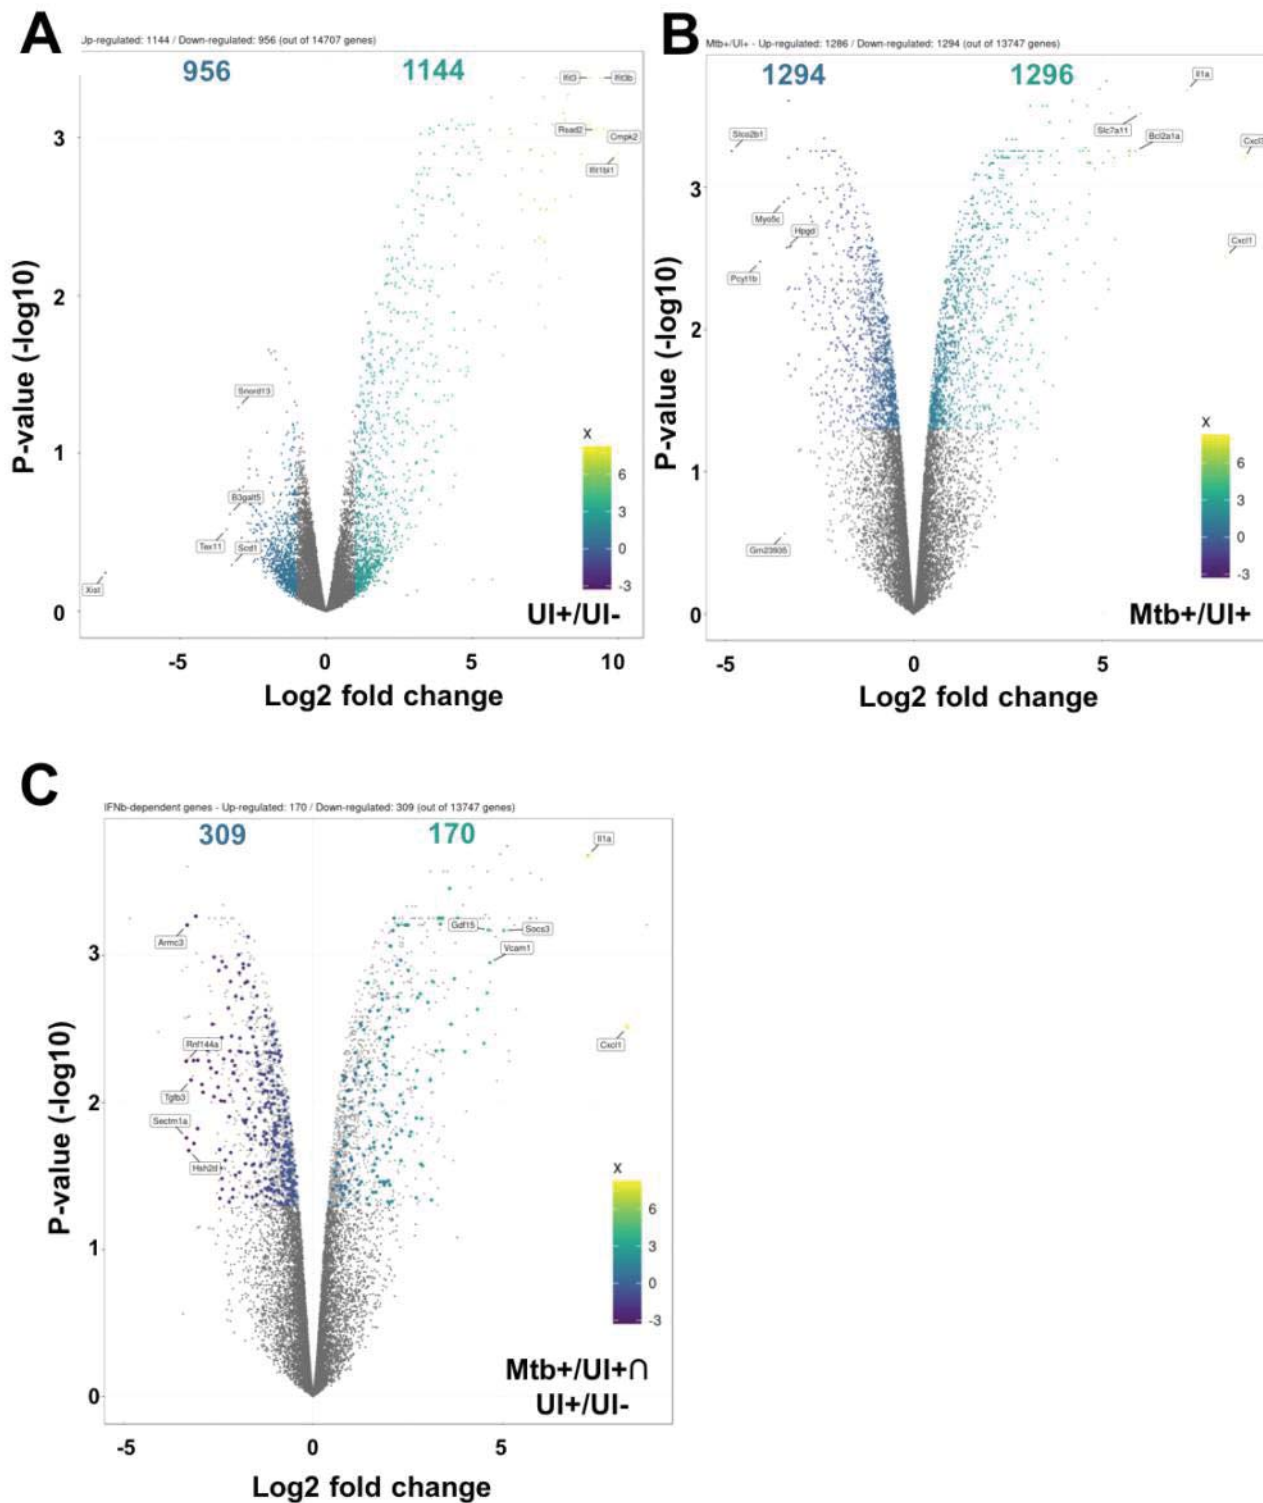

S2 Fig. Volcano plots of deregulated genes as determined by RNA-seq analyses.

P-values to Log<sub>2</sub> fold changes were plotted for the deregulated genes of the uninfected plus IFN- $\beta$  over uninfected minus IFN- $\beta$  contrast (A), the Mtb-infected over uninfected plus IFN- $\beta$  contrast (B) and the overlap of both of the contrasts (C).

# Figure S3

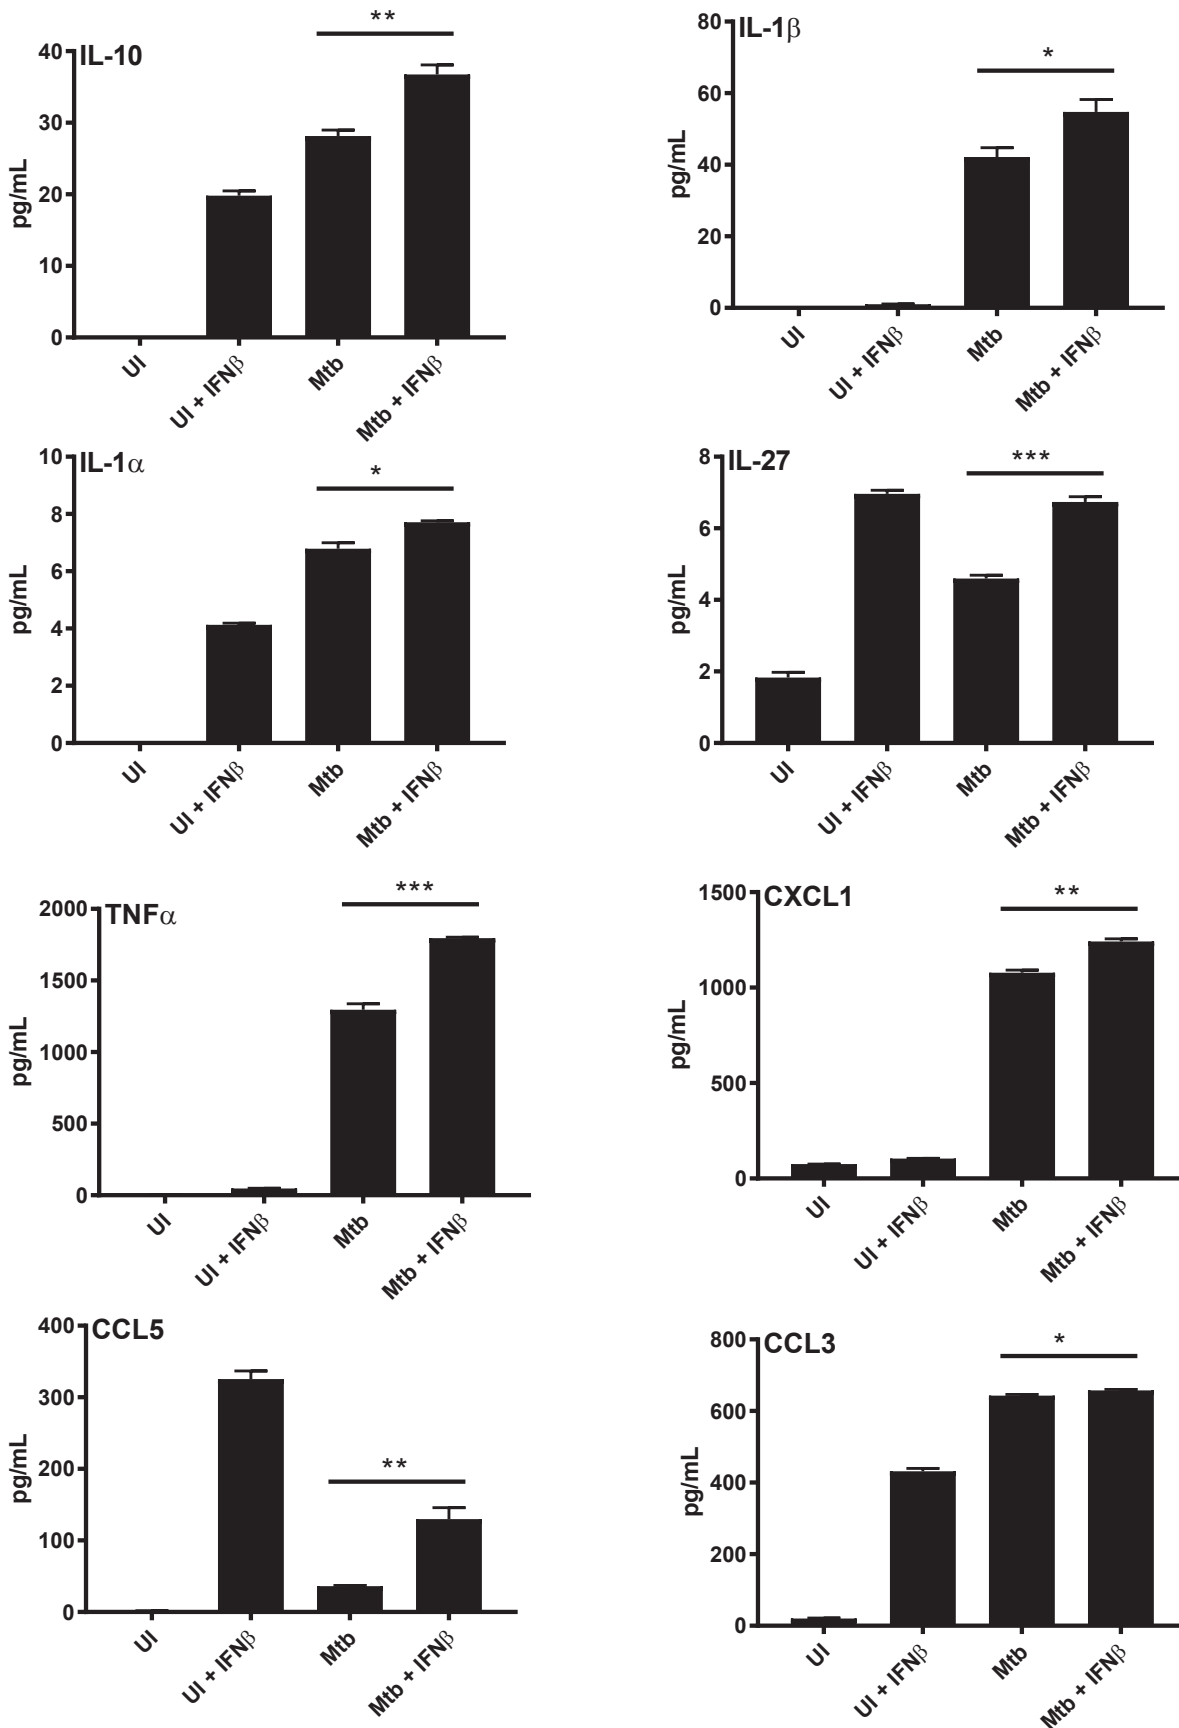

S3 Fig. Multiplex cytokine/chemokine analysis

Cell culture supernatants were collected at 6 hpi and were analyzed for indicated cytokines or chemokines using a custom ProcartaPlex magnetic bead-based multiplex assay (Thermo Fisher Scientific). Cytokine/chemokine secretion data are representative of a combined three independent experiments and are presented as mean  $\pm$  S.E.M.
